# Supplementary material
Source: PubMed Central journal article supplement (PMC3536132)
Supplement: IAI.00642-12_zii999099945so1.pdf [file IAI.00642-12_zii999099945so1.pdf]

1 **SUPPLEMENTAL MOVIE LEGEND**

2 **Movie S1. Neutrophil recruitment and phagocytosis of wild type *S. iniae* at**  
3 **the otic vesicle.** Confocal microscopy, 20x objective. *Tg(mpx:dendra2)* larvae  
4 were microinjected in the otic vesicle at 72 hpf with ~100 CFU *S. iniae* 9117  
5 labeled with 5  $\mu$ M CellTracker Red dye. The movie starts ~10 mpi. Green  
6 fluorescent neutrophils were initially recruited to the localized site of infection.  
7 Several neutrophils took up red-labeled wild type bacteria. Total movie duration  
8 was 1 h 36 min. This movie is representative of at least 3 movies taken from 3  
9 separate experiments.

10

11 **Movie S2. Neutrophil recruitment and phagocytosis of the *cpsA* mutant at**  
12 **the otic vesicle.** Confocal microscopy, 20x objective. *Tg(mpx:dendra2)* larvae  
13 were microinjected in the otic vesicle at 72 hpf with ~100 CFU *cpsA* labeled with  
14 5  $\mu$ M CellTracker Red dye. The movie starts ~10 mpi. Green fluorescent  
15 neutrophils were initially recruited to the localized site of infection. Several  
16 neutrophils phagocytosed large amounts of red-labeled *cpsA* mutant. The  
17 engulfed bacteria were concentrated into single, large vacuoles in the  
18 neutrophils. Total movie duration was 1 h 28m. This movie is representative of at  
19 least 3 movies taken from 3 separate experiments.

20

21 **Movie S3. Macrophage recruitment and phagocytosis of wild type *S. iniae***  
22 **at the otic vesicle.** Confocal microscopy, 20x objective. *Tg(mpeg1:dendra2)*  
23 larvae were microinjected in the otic vesicle at 72 hpf with ~100 CFU *S. iniae*

24 9117 labeled with 5  $\mu$ M CellTracker Red dye. The movie starts ~10 mpi. Green  
25 fluorescent macrophages were initially recruited to the localized site of infection.  
26 One macrophage could be seen taking up red-labeled wild type bacteria. Total  
27 movie duration was 1 h 31m. This movie is representative of at least 4 movies  
28 taken from 4 separate experiments.

29

30 **Movie S4. Macrophage recruitment and phagocytosis of the *cpsA* mutant**

31 **at the otic vesicle.** Confocal microscopy, 20x objective. *Tg(mpeg1:dendra2)*  
32 larvae were microinjected in the otic vesicle at 72 hpf with ~100 CFU *cpsA*  
33 labeled with 5  $\mu$ M CellTracker Red dye. The movie starts ~10 mpi. Green  
34 fluorescent macrophages were initially recruited to the localized site of infection.  
35 At least one macrophage can be seen taking up red-labeled *cpsA* mutant. The  
36 bacteria were initially taken up into multiple vacuoles. Total movie duration was  
37 50 min. This movie is representative of at least 3 movies taken from 3 separate  
38 experiments.

39

40

41

42

43

44
